# Supplementary material for: A putative biomarker signature for clinically effective AKT inhibition: correlation of in vitro, in vivo and clinical data identifies the importance of modulation of the mTORC1 pathway
Source: PubMed Central journal article supplement (PMC4747185; doi:10.18632/oncotarget.6153), 2015-10-19
Supplement: oncotarget-06-41736-s002.pdf [file oncotarget-06-41736-s002.pdf]

Supplementary Table S1

| Patient ID | Cancer type | FIGO stage | Grade | Histological subtype | GSK2141795 dose    | Best CA125 response | CAS signal group |
|------------|-------------|------------|-------|----------------------|--------------------|---------------------|------------------|
| 100        | Ovarian     | 3c         | 3     | Serous               | 50mg               | -10                 | -                |
| 101        | Ovarian     | 4          | 3     | Serous               | 50mg               | -36                 | +                |
| 102        | Ovarian     | 4          | 2     | Serous               | 50mg               | -36                 | +                |
| 103        | Ovarian     | 4          | 3     | Endometrioid         | 50mg               | 13                  | -                |
| 1200       | Ovarian     | 2a         | 3     | Clear cell           | 75mg               | -59                 | +                |
| 1201       | Ovarian     | 3b         | 3     | Serous               | 75mg               | -76                 | +                |
| 1202       | Ovarian     | 3c         | 3     | Serous               | 75mg               | -25                 | -                |
| 1203       | Ovarian     | 4          | 1     | Serous               | 75mg               | 15                  | -                |
| 1205       | Ovarian     | 3c         | 3     | Clear Cell           | 25mg 2wk->75mg 2wk | 3                   | -                |
| 1206       | Ovarian     | 3c         | 3     | Serous               | 25mg 2wk->75mg 2wk | -8                  | -                |
| 1207       | Endometrial | 4b         | 3     | Endometrioid         | 25mg 2wk->75mg 2wk | -33                 | +                |
| 1208       | Ovarian     | 3          | 2     | Serous               | 25mg 2wk->75mg 2wk | -71                 | +                |
